# Supplementary material for: Downstream consequences of diagnostic error in pediatric anaphylaxis
Source: BMC Pediatr. 2018 Feb 7;18:40. doi: 10.1186/s12887-018-1024-z (PMC5803891; doi:10.1186/s12887-018-1024-z)
Supplement: Additional file 2: — Study data set. (XLSX 116 kb) [file 12887_2018_1024_MOESM2_ESM.xlsx]

## Sheet: Data-set
	Hospital	__Tertiary_hosp	Age_category	__Ambulance_arrival	ATS_Category	__ATS_1or2	Triage_presenting_complaint	ED_primary_Dx	ED_Dx_anaphylaxis	DepartureStatus	FirstSpecialtyConsultsReferral	EDLOSMins	IPLOSDays	ICULOSinMins	Weight_kg	Doc_seniority	Snr_doctor	Allergen_Class	Co_trigger	Food	Drug	Insect	Other	Setting	Exposure_time_recorded	Time_to_symptoms	Time_to_ambulance	__Time_to_ED	Allergic_comorbidity_total	Asthma	Eczema	Hayfever	Urticaria_Hx	Angioedema_Hx	Family_History_Anaphylaxis	Family_history_Atopy	Known_allergy_to_exposure	Previous_anaphylaxis	Previous_anaphylaxis_to_this_allergen	Previous_ED_anaphylaxis_presentation	Previous_autoinjector	Ventoli	HR_highest	HR_lowest	SBP_high	SBP_low	DBP_high	DBP_low	RR_high
1	1	1	2	0	2	1	1	42	0	1		683	0	0	26	2	0	1		3				2	1				0								1	1			3	0	138	79	112	109	75	67	26
2	1	1	1	0	2	1	2	4	0	1		490	0	0		3	0	2			1			1					1	1							0				0	1	168	129					50
3	2	0	1	0	2	1	2	2	0	2	1	155	1	0	20.8	3	0	1		1				5					0					1			0				0	0	166	115	110		77		22
4	3	0	0	0	2	1	3	42	0	0		214			7	4	1							1	1				0								0	0	0	0	0	0	150	119					38
5	1	1	2	1	2	1	1	1	1	1		258	0	0	19	4	1	1		2					1	15	160	180	0								0	0	0	0	0	0	118	96	120		61		28
6	1	1	3	0	2	1	2	1	1	1		222	0	0	53	3	0	1		3				1	1												0	1	1	1	3	0	141	108	127	109	75	47	20
7	1	1	2	0	2	1	2	1	1	1		476	0	0	24.7	3	0	1		9				3					0								0	0	0	0	0	0	143	99	106	89	83	53	28
8	1	1	2	0	2	1	1	1	1	1		323	0	0	30	3	0	1		2				1					0								1	1	1	1	1	0	82	68	106		61		22
9	1	1	2	0	2	1	1	1	1	1		246	0	0	23	3	0	1		6				1	1				1	1							1	0			0	1	114	64	120	110	90	66	28
10	1	1	3	0	2	1	1	1	1	1		656	0	0	52	3	0	1		2				1	1	30			0								1	1	1	0	2	0	86	58	125	98	79	57	24
11	1	1	2	0	2	1	1	1	1	1		190	0	0	23	4	1	1		2				12					1	1							1				3	0	110	85	101		62		26
12	1	1	2	0	2	1	2	1	1	1		398	0	0	36	4	1	2			3			1					0								0	0	0	0	0	0	124	108	107		61		24
13	1	1	1	0	2	1	1	1	1	1	1	365	0	0	11	4	1	1		1				1	1				1		1					1	1	1	1	0	0	0	177	143	119	103	69	57	38
14	3	0	1	0	2	1	2	1	1	1	1	799	0	0	13.7	4	1	1		2				7	1	5			1		1						0	0	0	0	0	0	133	90	132	106	94	65	24
15	3	0	2	0	2	1	2	1	1	0		255			21	4	1	1		1				3					1	1							1				3	0	120	88	126		75		32
16	2	0	0	0	3	0	2	42	0	2	1	117	1	0	9.5	1	0	1		6				1					0						1		0	0	0	0	0	0	155	120					35
17	1	1	1	0	3	0	5	2	0	0		84				3	0												1	1							0	0	0	0	0	0	126						28
18	1	1	0	0	3	0	2	2	0	1		244	0	0	9.24	3	0	1		9				1					0								0	0	0	0	0	0	150	143	105	92	81	55	32
19	2	0	1	0	3	0	2	42	0	0	1	237			10	3	0	1		2									0								0	0	0	0	0	0	148	122					20
20	3	0	3	0	3	0	2	3	0	2	2	148	0	0	54.7	3	0	1		1				5	1	60			0								0	0	0	0	0	0	101	67	146	119	87	72	22
21	1	1	2	0	3	0	2	2	0	1		239	0	0	22.5	4	1	1		12					1	120			0								1					0	120	87	100		60		26
22	3	0	2	0	3	0	2	4	0	0		131			20.41	4	1	1		3				1					1	1							1	0	0	0	0	0	127	110					25
23	1	1	1	1	3	0	2	1	1	1		300	0	0	12.94	3	0	1		6				1	1		30	67	1	1		1					0	1	0	0	1	0	170	120	107	94	66		36
24	1	1	2	1	3	0	2	1	1	1		285	0	0	25	4	1	1		3				1	1	0	12	60	1	1							1	0	0	0	0	0	122	50	116	110	83	80	25
25	2	0	3	0	3	0	2	1	1	1		611	0	0		1	0	1		1				1	1	30		40									0	0	0	0	0	0	114	75	136	112	78	63	24
26	1	1	2	0	3	0	2	1	1	1		666	0	0	23	2	0	1		3				1	1	100			0								1	0			0	0	129	94	104	96	64	54	28
27	1	1	0	0	3	0	2	1	1	1		104	0	0	8.6	2	0	1		7				1	1	90			0								0	0	0	0	0	0	127						36
28	1	1	3	0	3	0	2	1	1	1		166	0	0	36.9	2	0	1		11				3	1	10			0						1		0	0	0	0	0	0	90	55	119	111	74	71	20
29	1	1	1	0	3	0	2	1	1	1		240	0	0	14.2	3	0	1		7				1					0								1	0	0	0	0	0	111	95					22
30	1	1	1	0	3	0	2	1	1	1		276	0	0	10.5	4	1	1		3					1				0								1	0	0	0	0	0	170	140					22
31	3	0	1	0	4	0	2	1	1	1		186	0	0	11	4	1	1		3				1					0								0	0	0	0	0	0	136	121					40
32	3	0	2	0	1	1	5	1	1	2	1	822	1	0	48.4	3	0	1		6					1	5			0								0	0	0	0	0	0	132	77	152	93	100	50	26
33	3	0	2	0	2	1	2	42	0	2	1	182	0	0	39	3	0	1		2				1	1				1	1	1	1				1	1	1	1		3	0	122	98	153	102	95	65	28
34	1	1	1	1	2	1	2	1	1	1		631	0	0		3	0	1		2				1	1		26	46	0								1	0	0	0	0	0	160	102	108		66		50
35	2	0	3	0	2	1	2	1	1	1		379	0	0		2	0	1		3				13					0								0	1	0	1	3	0	89	45	137	115	70	52	22
36	1	1	1	0	2	1	1	1	1	1		764	0	0	14.2	3	0	1		1				1	1	50			1					1			1	0	0	0	0	0	190	112	115	92	87	60	36
37	3	0	0	0	2	1	2	1	1	1		419	0	0	11.3	4	1	1		3				1		15			0								0	0	0	0	0	0	150	102					44
38	1	1	1	1	3	0	2	1	1	1	1	1269	1	0	12.7	3	0	1		3				1	1		58	73	0								0	0	0	0	0	0	154	110	88	72	53	44	48
39	1	1	1	1	2	1	1	2	0	1		355	0	0	13.5	3	0	1		9				1	1	120	165	185	1	1	1						1				0	1	112	96	90		50		28
40	3	0	1	1	2	1	2	42	0	0		123			14.4	3	0	1		3				1					0								1	0	0	0	0	0	135						20
41	2	0	3	0	2	1	2	3	0	1		272	0	0	68	2	0							1	1				1				1	1			0	0	0	0	0	0	110	97	121	102	86	67	18
42	1	1	1	0	2	1	2	47	0	0		231			12	3	0	1		3									0								1	0	0	0	0	0	151		112		76		28
43	2	0	1	0	2	1	1	2	0	0		117			11.5	3	0	1		2					1				0								0	0	0	0	0	0	164	135					24
44	2	0	0	0	2	1	2	42	0	0	1	113			9.2	3	0	1		6				1	1	15			0								1	0	0	0	0	0	156	122					44
45	3	0	1	0	2	1	2	2	0	2	1	541	0	0	14.9	4	1	1		1				1	1				0								0	0	0	0	0	0	123	80	98	97	60	46	28
46	1	1	1	1	2	1	2	1	1	1		308	0	0	16	3	0	1		2				1	1				1	1							1				0	0	130	107	113	84	69	53	32
47	1	1	0	1	2	1	2	1	1	2	1	201	1	0	7	4	1	1		6				1	1	30	65	95	1		1						0	0	0	0	0	0	178	134	90	86	54	54	34
48	1	1	2	0	2	1	1	1	1	1		817	1	0	45	3	0	1		2				5	1	30			0								1	0	0	0	0	0	78	58	128	107	69	61	32
49	2	0	2	1	2	1	2	1	1	1	1	358	0	0	51	1	0	1		5				3					0								1	1	1	1	0	0	150	92	143	110	83	60	28
50	1	1	3	1	2	1	2	1	1	1		412	0	0		3	0	1		3				3	1	2	30	54	1	1							0	1	1	1	3	0	108	77	138	116	93	71	18
51	2	0	0	1	2	1	2	1	1	2	1	147	0	0	12	4	1	1		9				1	1	4	87	120	1		1						0	0	0	0	0	0	158	122					36
52	1	1	1	0	2	1	2	1	1	1		287	0	0	10	4	1	1		3					1	50			0								0	0	0	0	0	0	120	107	103	95	65	52	40
53	2	0	0	1	3	0	1	39	0	0		133				1	0	2			14			10	1	5			0								0	0	0	0	0	0			150	136			40
54	1	1	1	1	3	0	2	42	0	0		87			9	2	0							1	1		22	57	1	1							0					1	120	106	70				32
55	1	1	3	1	3	0	2	42	0	0		129			80	2	0	1		1				5	1		234	255	1	1							0	0	0	0	0	0	124	116	167	122	80	73	20
56	2	0	3	1	3	0	2	2	0	2	1	200	0	0		3	0	1		1				5	1	30	210	230	0								0	0	0	0	0	0	100	61	133	104	65	54	18
57	3	0	0	1	3	0	2	42	0	1		351	0	0	9.9	3	0	1		7				1	1	105			0								0	0	0	0	0	0	142	114					36
58	1	1	1	1	3	0	2	18	0	1		118	0	0	13	4	1	1		2				1	1		113	134	0								1				3	0	110	92					28
59	1	1	0	1	3	0	2	42	0	1		786	0	0	9.2	4	1	1		7				1	1	180			0								0	0	0	0	0	0	160	115					61
60	2	0	2	1	3	0	11	2	0	0		136			35	4	1							3					1	1		1			1	1	0		0	0	0	1	120	93	117	109	80	60	20
61	1	1	3	0	3	0	2	3	0	0		59			64.5	2	0	4					4	1					1	1							0	0	0	0	0	1	74
62	1	1	1	0	3	0	2	42	0	0		179			18.2	2	0	1		3				1	1	19			0								1	0	0	0	3	0	124	107	104	95	57	43	32
63	3	0	2	0	3	0	2	42	0	0		140				2	0	1		9					1	10			0								0	0	0	0	0	0	115	95	108		56		22
64	1	1	1	0	3	0	2	18	0	1		86	0	0		3	0	1		1				1	1	30			0								0	0	0	0	0	0
65	1	1	2	0	3	0	2	42	0	1		117	0	0	18	3	0	1		11				1	1				1	1							0	0	0	0	0	0	129	113					27
66	1	1	2	0	3	0	2	42	0	1		196	0	0	39.5	3	0	1		3				13	1				0								1	0	0	0	0	0	102	70	125	99	72	63	18
67	1	1	2	0	3	0	2	2	0	1		194	0	0	23.5	3	0	1		3				2	1		16	30	1	1				1			0	0	0	0	0	1	140	86	110				24
68	1	1	0	0	3	0	2	42	0	1		257	0	0	9.88	3	0	1		7				1					0								0	0	0	0	0	0	138	118					38
69	1	1	0	0	3	0	2	42	0	1		308	0	0	6.2	3	0	1		6				1	1				1		1						0	0	0	0	0	0	152	131					34
70	1	1	2	0	3	0	2	42	0	1		237	0	0	22	3	0	1		3				1	1		13	47	0								0	0	0	0	0	0	79	71	105	90	71	40	24
71	2	0	2	0	3	0	2	2	0	0		79			33.7	3	0	1		2					1	120			1			1					0	0	0	0	0	0	160	103					22
72	3	0	3	0	3	0	2	42	0	1		114	0	0	44.5	3	0	1		3				1	1				1	1							1					0	81	80	103		68		20
73	1	1	1	0	3	0	2	2	0	1		234	0	0	12	4	1	1		2				1	1	5			1		1						0	0	0	0	0	0	101	89					24
74	2	0	2	0	3	0	2	42	0	0		60			29	4	1	1		5					1				1	1	1						1	0	0	0	0	0	105
75	3	0	3	0	3	0	2	42	0	1		145	0	0	40.2	4	1	1		3				1	1				0								0	0	0	0	0	0	90	63					20
76	3	0	1	0	3	0	2	42	0	0		161				4	1	1		1				1	1	5			1	1							0	0	0	0	0	0	123	120					25
77	3	0	1	0	3	0	2	2	0	1		193	0	0	17.3	4	1							1					1	1							0	1	0	0	0	1	127	104					30
78	2	0	1	0	3	0	2	2	0	2	1	309	0	0	11.05	3	0	1		6					1	0			1	1							0				1	1	146	109					36
79	1	1	1	1	3	0	1	42	0	1		232	0	0		2	0	1		2				1	1	5	95	133	0								0	0	0	0	0	0	130	101					22
80	1	1	1	1	3	0	2	1	1	1		201	0	0	17	3	0	1		2				2	1				1	1	1						1	1	1		1	0	129	100	80		40		20
81	1	1	0	1	3	0	2	1	1	1		287	0	0	6.67	3	0	1		7				1	1		26	63	0								0	0	0	0	0	0	150	130	79		46		36
82	1	1	1	0	3	0	2	1	1	1		267	0	0	16	3	0	1		5				1	1	50			0								0	1	0	1	1	0	134	108					24
83	1	1	2	0	3	0	2	1	1	1		288	0	0	18	4	1	1		8				6	1	10			0								0	0	0	0	0	0	123	96	111	96	65	33	26
84	1	1	2	1	3	0	2	1	1	1		183	0	0	21.08	3	0	1		1				11		15			1		1						0	0	0	0	0	0	140	87	119		87		28
85	3	0	2	1	3	0	1	1	1	1		165	0	0	43	3	0	1		9				1	1	1	32	60	1	1	1			1			0	1				0	85	70	120				20
86	2	0	2	1	4	0	2	2	0	0		164				3	0	1		1				1	1	42	70		1	1							0	0	0	0	0	0	116	105	115	110	80	70	20
87	3	0	3	0	4	0	2	47	0	0		54			56	2	0							1					0								0	0	0	0	0	0	90	75	122		84		16
88	3	0	2	0	4	0	3	2	0	0		68				2	0							1	1												0	0	0	0	0	0
89	1	1	1	0	4	0	2	42	0	0		68				3	0	1		2				5	1				1	1							0	0	0	0	0	1	135
90	3	0	2	0	4	0	2	47	0	1		230	0	0	21.1	4	1	1		3				1	1				0								0	0	0	0	0	0	95	94					20
91	3	0	3	0	4	0	2	42	0	1		756	0	0	51.7	4	1	1		1				1	1	30			1	1							0	0	0	0	0	0	104	74	127	118	78	71	18
92	3	0	2	0	5	0	20	2	0	0		16				3	0	1		1				11					0								0	0	0	0	0	0	124						18
93	2	0	0	1	1	1	1	1	1	2	1	187	0	0	9.34	1	0	1		11				1	1	2	34	80	1		1						0	0	0	0	0	0	185	84	99	90	63	60	36
94	1	1	1	1	2	1	1	42	0	1		531	0	0	12	4	1	1		12				1	1		18	37	1		1						0	0	0	0	0	0	140	108					34
95	1	1	1	0	2	1	1	42	0	1		906	1	0	15	4	1	1		5									1		1						0	0	0	0	0	0	149	82	93		51		48
96	3	0	1	0	2	1	2	42	0	0		111				4	1	1		7				1					1		1						1	0	0	0	0	0	105
97	2	0	2	1	2	1	1	1	1	2	1	149	1	0	19.86	3	0	4					3	7					0								0	0	0	0	0	0	155	133	125	80	62	37	24
98	2	0	2	1	2	1	1	1	1	2	1	61	0	0	16.7	3	0	3				6			1	30	65	105	0								0	0	0	0	0	0	150	130					28
99	1	1	2	1	2	1	1	1	1	1		177	0	0	27	3	0	1		1				2					1	1							0	0	0	0	2	0	100	88	115	100	47		20
100	3	0	3	1	2	1	1	1	1	1		997	1	0	69.8	4	1	2			21			10	1	2			1	1							0	0	0	0	0	1	94	66	130	109	72	50	20
101	3	0	0	1	3	0	2	42	0	0		131			8.74	1	0	1		7				1	1				0								0	0	0	0	0	0	133	120					30
102	1	1	2	1	3	0	2	42	0	1		800	0	0	25	3	0	1		1				1					0								0	0	0	0	0	0	105	84	111	100	72	61	32
103	2	0	1	1	3	0	2	42	0	0		218			12	3	0	1		9				1	1		15	49	1	1							0	0			0	0
104	1	1	2	1	3	0	2	2	0	1		237	0	0		4	1	1		3				1	1	120	150	180	0								1	1	1		3	0	114	107	110	90	72	50	27
105	3	0	2	1	3	0	13	2	0	0		38				4	1	1		3				2					0								0	0	0	0	0	0	104	88	95		65		24
106	3	0	3	0	3	0	2	2	0	1		317	0	0	100	2	0	2			9			1	1				0								0	0	0	0	0	0	83	78	137	131	77	62	18
107	1	1	1	0	3	0	5	42	0	0		79				3	0	1		3									1		1						0					0	132	124					44
108	1	1	0	0	3	0	2	42	0	0		119			8.7	3	0	1		7				1	1	30			1		1						0	0	0	0	0	0	188	118					52
109	3	0	2	0	3	0	2	42	0	0		46			42.8	3	0	1		1					1				1	1	1						1	1		1	3	0	108	78	139		91		20
110	3	0	2	0	3	0	2	42	0	0		108			20.3	3	0	1		6									0								0	0	0	0	0	0	109	88					20
111	3	0	1	0	3	0	2	42	0	1	1	291	0	0	18.3	4	1																			1	0				0	0	111	94					24
112	1	1	3	0	3	0	2	42	0	1		258	0	0		3	0	1		3				2		5			0	0	0	0	0	0			0	0	0	0	0	0	71	60	110	98	61	55	20
113	3	0	2	0	3	0	2	42	0	0		181			35	4	1	1	1	1				12	1		35	75	0								0					0	124	106	104		66		20
114	1	1	3	1	3	0	1	1	1	1		451	0	0	70	3	0	1		3				3	1		50	87	0								0				0	0	108	88	142	107	90	57	22
115	1	1	3	1	3	0	2	1	1	1		215	0	0		4	1	1		1				1	1	10	25		1	1					1	1	0	0	0	0	0	0	108	89	150	116	80	71	30
116	2	0	2	0	3	0	2	1	1	0		113			28	3	0	1		3				1					0								1	0	0	0	0	0	105	76					20
117	1	1	1	1	3	0	1	1	1	1		266	0	0	15	3	0							1	1		58	88	1		1						0				0	0	128	123					24
118	1	1	2	1	4	0	2	42	0	1		149	0	0	32	4	1	1		3				3	1	60	205	235	1	1								Nuts			3	0	110	105	90	109	60		20
119	3	0	2	1	4	0	2	2	0	1		318	0	0	41.3	4	1	2			1			1					0								0	0	0		0	0	112	85	110				20
120	1	1	2	0	4	0	2	12	0	0		76			31	3	0	1		2				2					0								1					0	76
121	1	1	2	0	4	0	5	2	0	0		127			20.9	3	0	4					2	1					1		1						0	0	0	0	0	0	86						24
122	3	0	1	0	4	0	16	2	0	0		104			15.9	3	0	3					3	1	1				0								0	0	0	0	0	0	131	119					18
123	1	1	2	0	4	0	29	42	0	0		127			28.9	4	1	1		3									1		1					1	0	0	0	0	0	0	89						18
124	1	1	1	0	4	0	11	2	0	0		25				4	1							7					1	1							0	0	0	0	0	0	124						24
125	1	1	1	0	4	0	2	42	0	1		325	0	0	8.3	4	1	1		3				1					1		1						0	0	0	0	0	0	133	129					42
126	3	0	2	0	4	0	26	2	0	0		155				4	1	3				6		7	1	30			0								0	0	0	0	0	0	94	81	102		56		20
127	2	0	3	0	4	0	1	1	1	1		338	0	0	80	2	0	1		3				1	1				1	1	1						0	0	0	0	0	0	88	74	142	124	76	70	18
128	1	1	3	0	4	0	2	1	1	1		153	0	0		3	0	1						3	1				1	1							0	0	0	0	0	0	85	55	138		68		20
129	1	1	1	0	5	0	30	2	0	0		70			8.5	4	1	1		3									1		1						0	0	0	0	0	0	124						28
130	3	0	1	1	4	0	9	42	0	0		84			12.6	2	0	1		11					1		5	47	0								0	0	0	0	0	0	181						28
131	1	1	2	1	2	1	1	1	1	1		661	0	0	28	4	1	1		4				1	1	10	30	70	1	1							0	1	0		0	1	112	88	105	97	67	54	24
132	1	1	3	1	3	0	2	42	0	0		175				2	0	1		1				5	1	435	480	506	0								0	1	0	1	0	0	95	78	110	105	73	71	18
133	1	1	0	1	3	0	2	2	0	1	1	238	0	0	6.7	3	0	2			13			10	1	30			0								0	0	0	0	0	0	136	97					32
134	1	1	2	0	3	0	2	42	0	1		108	0	0	18.6	2	0	1		1				1	1	10			1	1							0	1			3	1	99	97					20
135	2	0	1	0	3	0	2	42	0	0		221			12	3	0	1		2				1	1				0								0	0	0	0	0	0	122	114	117		65		20
136	1	1	2	1	3	0	1	1	1	1		195	0	0	23.7	4	1	1		3				1	1	0	210	242	1	1	1						0	0	0	0	0	1	126	89	123	90	77	60	48
137	3	0	3	1	3	0	2	1	1	1		163	0	0		4	1	1		6				1	1	50	65	90	1	1	1						0	1	1	1	0	0	104	91	130	105	81	54	17
138	1	1	2	0	2	1	2	1	1	1		103			21	3	0	1		3				1	1				1	1							1	0	0	0	1	1	126	60	109	108	81	68	24
139	3	0	0	0	1	1	5	42	0	2	1	312	1	0	6.3	3	0	1		11				1					1		1						0	0	0	0	0	0	180	117	137		88		62
140	2	0	0	1	3	0	2	42	0	2	1	152	1	0	11.05	3	0	1		7				1	1	0	119	127	0								0	0	0	0	0	0	153	133					35
141	1	1	1	0	3	0	2	42	0	2		534	0	0	9.44	3	0	1		7				1	1	45			0							1	1	0	0	0	0	0	178	107					50
142	3	0	1	0	3	0	1	1	1	0		347			12	4	1	1		2				1		60			0								0	0	0	0	0	0	154	115	75				28
143	1	1	2	0	2	1	1	1	1	1		265	0	0		4	1	1		12				2					0								1	1	1	1		0	130	114	109	91	74	58	42
144	1	1	1	1	2	1	1	1	1	2	1	153	1	0	20	3	0	1		2				1	1	0	85	135	1				1	1			0					0	180	124	112	85	72	69	25
145	1	1	0	1	2	1	2	1	1	1		273	0	0	6.25	4	1	1		3					1		57	105	1		1						0	0	0	0	0	0	180	60					60
146	1	1	2	1	3	0	1	1	1	1		322	0	0	25.8	3	0	1		9				3	1		107	156	0								1	1	1	0	0	0	116	96	103	102	86	61	28
147	1	1	3	0	3	0	2	47	0	1		355	0	0	55	3	0												0						1		0	0	0	0	0	0	115	102	117	93	77	62	18
148	1	1	3	0	3	0	2	42	0	1		651	0	0		3	0												1	1							0					0	100	76	135	93	80	57	18
149	3	0	3	0	2	1	2	47	0	0		198			59	3	0							1					1	1							0	0	0	0	0	0	73	61	148	92	72	56	18
150	1	1	0	1	1	1	1	1	1	3	1	79	1	1452	9.6	3	0	1		7				1	1	0	43	60	1		1						0	0	0	0	0	0	181	156	90	69	40	30	50
151	1	1	3	0	2	1	2	1	1	1		305	0	0		4	1	1	1	1				12		30			0								0	0	0	0	0	0	120	66	126	70	83	40	18
152	1	1	2	1	3	0	2	1	1	1		353	0	0	20	3	0							3	1		70	120	0								0	1	0	0	3	1	148	53	104	40	64	49	24
153	1	1	2	1	2	1	1	1	1	0		211			22	3	0	2			1			1	1	2	8	40	0								0	0	0	0	0	0	124	96	122	0	80	0	24
154	3	0	3	1	3	0	2	47	0	0		31			39.6	3	0	1						1	1		12	38	0								0	0		0	0	0	83	78	80	0			22
155	1	1	2	0	1	1	1	1	1	2	1	210	1	0	36.7	3	0	1		3				1	1	1			1		1						1	0	0	0	0	0	150	97	120	0	74	55	20
156	1	1	1	0	4	0	1	1	1	1		205	0	0	13	2	0	1		6				1	1	5			1	1	1						1	1	1		3	0	110	90	98	86	68	49	38
157	1	1	2	1	2	1	2	1	1	1		786	0	0	18.3	3	0	1		11				1	1				1	1							0	1	1	1	1	1	125	78	100	97	85	66	25
158	1	1	1	1	2	1	1	1	1	1		215	0	0	13	3	0	1		11				8	1	60	125	148	1		1						0	1	0	1	1	0	132	112					34
159	1	1	1	1	2	1	1	1	1	1		267	0	0	16.2	3	0	1		9				1	1		71	115	1	1	1	1					0	0	0	0	0	0	145	76	115	76	53	33	30
160	3	0	2	1	2	1	1	1	1	1		224	0	0	27	3	0							3	1		18	43	1	1	1						0	1		1	1	1	93	85	120	95	70	50	24
161	1	1	3	1	3	0	1	42	0	1		168	0	0	45	3	0	1		2				1	1	90	130	240									0	1	1	1	1	0	102	80	101		65		22
162	3	0	2	1	3	0	2	2	0	2	1	206	0	0	24	4	1	1		2				1	1	0	20	53	0								0	1	1	1	1	0	111	82	142	95	97	62	50
163	2	0	1	1	3	0	1	1	1	0	1	174			12.5	3	0	1		1				2	1	40	61	100	1			1					0	1		1	1	0	145	120					32
164	1	1	1	1	3	0	2	1	1	1		166	0	0	16	4	1	1		6					1		20	75	0								0	1	0		1	0	112	82					26
165	1	1	1	1	4	0	2	42	0	1		273	0	0	12	3	0	1		9				1	1		40	66	1		1						0	1	0	1	1	0	110	102					36
166	1	1	3	1	4	0	1	1	1	0		79				2	0	1		12				3					1	1							0	1	1	1	3	1	70		106		69		15
167	1	1	2	1	4	0	1	1	1	1		173	0	0		4	1	1		2				3	1	25	50	70	0							1	0	0	0	0	0	0	110	92	136	91	68	64	18
168	1	1	1	1	2	1	1	1	1	1		265	0	0	10	4	1	1		5				2					0								1	0	0	1	1	0	140	111	92	85	61	41	36
169	1	1	1	0	3	0	2	42	0	1		323	0	0	17	3	0	1		2				7	1				0								1				1	0	125	88	80				24
170	1	1	1	1	3	0	1	1	1	1		206	0	0	11	3	0	1		3				1	1	0	16	61	1		1						1	1	1	0	1	0	148	136					34
171	3	0	2	1	3	0	1	2	0	1		247	0	0	27	1	0							3					1	1	1						0	1		1	1	1	112	86	117	112	71	70	22
172	1	1	2	1	3	0	1	1	1	1		146	0	0	18	3	0	1		7				8	1	2	30	75	0								1	1	1	1	1	0	112	96	90		50		20
173	1	1	1	1	3	0	1	1	1	1		218	0	0	17	3	0	1		1				1	1		139	161	0								0	1	0	1	1	0	122	118	101		73		26
174	1	1	2	1	4	0	2	2	0	1		188	0	0	22	2	0	1		3				1	1	5	26	53	1		1						1	1	1		1	0	146	105					27
175	1	1	2	1	2	1	1	1	1	1		839	0	0	25.7	3	0	1		1				3	1	30	30	60	1	1	1						0	1			1	0	128	79	120	109	78	67	28
176	1	1	1	1	3	0	1	1	1	1		308	0	0		4	1	1		1				1		5			1	1							0	1	0	1	1	1	122	100	98	80	63		24
177	1	1	2	1	2	1	2	1	1	1		720	0	0	20	3	0	1		11				1	1		40	73	1	1							0	1	0		1	0	130	63	105	85	57	54	28
178	1	1	2	1	2	1	2	1	1	1		274	0	0	18	4	1	1		1				1					1	1							0	1	0	1	1	0	230	109	106	75	66	56	24
179	2	0	3	1	3	0	1	1	1	4		300	1	915	60	4	1	1		2				14	1	0	24	58	1		1						0				3	0	140	94	130	101	87	38	28
180	1	1	1	0	3	0	2	1	1	1		191	0	0	11.6	3	0							1	1				1		1					1	0	1	0	1	1	0	150	140	137	60	81	30	28
181	1	1	2	1	2	1	2	4	0	1		333	0	0	18	4	1	1		1				3	1		10	61	1	1	1						0	1		1	1	0	178	90	108	64			46
182	1	1	2	1	2	1	1	1	1	1		578	0	0	21	3	0	1		1				3	1				1	1							1	1			1	1	128	79	116	76	56	35	28
183	3	0	2	1	3	0	2	1	1	0		218			20.1	4	1							1					1	1							0	1		1	2	1	109	100					28
184	1	1	3	0	2	1	1	1	1	1		212	0	0	55	3	0	1		1				5	1	45			0								0	1	1	1	3	0	120	82	154	140	80	79	20
185	1	1	2	1	2	1	1	1	1	1		249	0	0	50	3	0	1		3				5	1		130	165	0								0	1	1		2	0	119	88	120	110	72	70	20
186	1	1	2	1	3	0	1	42	0	1		769	0	0	25.04	3	0	1		2				1	1	5	18	59	1	1	1						1	1	1	1	2	0	111	81	107	84	70	44	24
187	1	1	3	1	3	0	2	1	1	1		224	0	0	55	2	0	1		1				5	1	5	15	55	0								0	1	1	1	3	0	111	84	126	100	77	66	24
188	1	1	3	1	3	0	1	1	1	1		237	0	0		3	0	1		2				1	1	30	100	130	0								0	0	0	0	2	0	120	100	140	110	90	61	20
189	1	1	2	0	3	0	2	1	1	1		202	0	0		3	0	1		1									1		1						1	1	0	0	3	0	105	92	117	113	77	67	26
190	1	1	3	1	4	0	2	1	1	1		202	0	0		4	1	1	2	1				1	1	120	130	160	1	1							0				3	1	110	76	120	112	70	63	18
191	1	1	2	1	2	1	2	42	0	1		215	0	0	55	3	0	1		1				1	1	40			0								1	1	1	1	3	0	120	98	134	116	76	63	28
192	1	1	3	0	2	1	1	1	1	1	1	1108	1	0	55	3	0	1		1				11					0								0	1	1	1	3	0	144	78	151	110	72	59	22
193	1	1	3	1	3	0	2	2	0	1		156	0	0		2	0							1					1	1							0	1		1	3	0	85	84	112	100	71		20
194	2	0	3	1	3	0	2	42	0	0		85				2	0	1		3				3	1		45	50	0								0	1	1		2	0	94	84	130	113	85	65	20
195	1	1	3	1	3	0	1	42	0	1		193	0	0		3	0	1		3				5					1	1							1	1		1	3	0	95	78	116	97	65	58	20
196	1	1	3	0	3	0	2	1	1	1		223	0	0	55	3	0	1		1				1	1	50	90	110	0								0	1	1	1	3	0	97	68	110				25
197	1	1	2	1	3	0	1	1	1	1		611	0	0		3	0	1		3				1	1	0	41	66	1	1	1	1				1	1	1	1	1	2	1	92	72	120	115	78	60	24
198	1	1	3	1	3	0	2	1	1	0		232			58	2	0	1		2				1	1	1	10	45	0								0	1	1	1	3	0	86	60	140	80			24
199	2	0	3	0	3	0	11	1	1	2	1	187	0	0	60	3	0							3	1		38	69	1	1							0	1	0	0	3	1	118	100	123	90	86	57	18
200	1	1	1	0	3	0	2	42	0	1		751	1	0	23.56	3	0	1		2					1	0			1	1	1						1	0	0	0	2	0	122	75	109		68		26
201	3	0	3	1	2	1	1	1	1	1		292	0	0		4	1	1		3				1	1	10	20	60	1	1	1						0	1		1	3	0	84	72	156	115	68	62	20
202	2	0	3	1	3	0	1	42	0	1		377	0	0		2	0	1	1	11				3					1			1					0	1		1	3	1	86	70	139	122	70	66	18
203	3	0	2	0	4	0	2	1	1	1		216	0	0	43.2	1	0	1		2				1					1	1							1	1		1	3	0	110	85					24
204	1	1	2	1	3	0	9	42	0	0		156				2	0	1		2				3	1	180	30	90	1	1							0	0	0	0	0	0	105	83	110	98	62		20
205	1	1	3	0	3	0	1	1	1	0		295			60	3	0	1		1				5					1	1	1						1					0	112	74	112	101	70	49	20
206	1	1	3	1	3	0	2	1	1	1		217	0	0	46	2	0	1		1				3	1	5	70	140	0								0	1			3	0	120	84	109	93	70	57	20
207	1	1	2	0	2	1	2	1	1	1		272	0	0		1	1							3													0	1		1	3	0	130	110	80	70	40	13	32
208	1	1	1	0	3	0	1	1	1	0		385				3	0	1																			0					0
209	1	1	2	0	3	0	2	1	1	1		277	0	0		1	1																				0					0
210	1	1	2	0	3	0	2	1	1	0		239				3	0																				0					0
211	1	1	2	1	2	1	2	1	1	1		722	0	0	50	3	0	1		3				1	1		85	120	1	1							0	0	0	0	0	0	128	81	150	99	87	49	24
[truncated: 178 more columns]

## Sheet: Key
Arrivaldate	Date of arrival	DD/MM/YEAR
Arrivaltime	Time of arrival	HH:MM
Hospital	Hospital	1=MMC, 2= Dandy, 3=Casey
Age_years	Age	Years (>2)
Age_months	Age	Months
Age_category	Age	0=<1 year, 1=1-4 years, 2=5-11 years, 3=12+ years
Gender	Gender	1=Male, 2= Female
Ambulance_arrival	Ambulance diagnosis	Blank = not specified, 1= anaphylaxis , 2= allergic reaction, 3= shortness of breath, 4= altered conscious state, 5= chest pain, 6= rash, 7= swollen lips/facial swelling, 8= seizure, 9 = faint, 10 = febrile
ATS_Category	ATS Category	1,2,3,4,5
Triage_presenting_complaint	Triage	1= anaphylaxis, 2= allergic reaction, 3= rash, 4= resp other, 5=SOB, 6= soft tissue injury, 7= unwell child, 8= vomiting, 9=abdo pain, 10= anxiety, 11= asthma, 12= bite/sting, 13= chest pain, 14= collapse, 15= convulsion, 16= cough, 17= crying, 18= diarrhoea, 19= ENT, 20 = eye problem, 21= febrile, 22= gastro, 23= unwell, 24= genital, 25= GI bleed, 26= head injury/ headache, 27 = soft tissue infe…
ED_primary_Dx	ED diagnosis	1= anaphylaxis, 2= allergy/NEC, 3= Angioneurotic oedema / Giant urticaria / Quicke's oedema, 4= asthma, 5= atopic eczema, 6= UTI, 7= bite, 8 = bronchiolitis, 9= cellulitus, 10= chicken pox, 11= cold sore/ herpes, 12= collapse, 13= conjunctivitis, 14= convulsion, 15= costochondritis, 16= cough, 17= croup, 18= dermatitis/eczema, 19= dystonic reaction, 20= eczema herpeticum, 21= erythema multiform, …
ED_Dx_anaphylaxis	ED Anaphylaxis Diagnosis	0 = No, 1= Yes
DepartureStatus	Discharge	0=Home, 1=Observation / short stay unit, 2=Ward, 3=ICU, 4=transfer to MMC ICU, 5=interhospital transfer for same level of care, 6= left after treatment started, 7= left without treatment
FirstSpecialtyConsultsReferral	Consults	1= Gen Paeds, 2= anaesthetics, 3= derm, 4= ENT, 5= gastro= 6= ID, 7= opthal, 8= rheumatology, 9=plastics, 10= toxicology
EDLOSMins	ED LOS	Minutes
IPLOSDays
ICULOSinMins
Weight_kg	Weight	kg
Doc_seniority	Seniority of treating doctor	1=Intern, 2=Resident, 3=Reg, 4=Consultant If unclear list name
Allergen_Class	Allergen	1=Food, 2=Drugs, 3=Insect, 4=Other, Blank = unknown
Co_trigger	Possible co trigger	1=exercise, 2=vaccination
Food	Food	1=Multiple foods/unclear allergen, 2= Peanut, 3=Tree nut, 4=Shellfish, 5=Fish, 6=Cow milk, 7=Egg, 8=Wheat, 9= Fruit/vegetable, 10=Soy milk , 11= other, 12= sesame, 13= honey
Drug	Drug	1= Amoxy, 2= Augmentin, 3= bactrium, 4= ceclor, 5= cephalexin, 6= clarithromycin, 7= erythromycin, 8= flucloxacillin, 9= roxithromycin, 10= penicillin, 11= ABX not specified, 12= general anaesthetic, 13= local anaesthetic, 14= vaccination, 15= chemo, 16= benzly benzoate, 17= codeine, 18= contrast, 19= cough syrup, 20= dermaveen, 21= desensitiation, 22= elidel cream, 23= endone, 24= gapapentine, 2…
Insect	Insect	1= Bee, 2= Wasp, 3=Ant, 4= mosquito, 5= spider, 6= unknown If not covered list
Other	Other	1= clothing, 2= cosmetics/shampoo/creams, 3= animals, 4= grass/plants, 5= household cleaner, 6= hot shower, 7= pool , 8 = plastic
Setting	Setting	1= Own home, 2=Friend's/family member home, 3= School/chlidcare, 4=Hospital, 5=Restuaraunt/Cafe, 6=Car, 7=Outdoor, 8=Supermarket/Market/Shopping centre , 9=Work, 10=Doctor office, 11=public, 12= sporting ground, 13 = church, 14 = public transport Blank = unknown
Exposure_time_recorded	Time of exposure	HH:MM
Time_to_symptoms	Time to symptoms	Minutes
Time_to_ambulance	Time to ambulance arrival	Minutes - Blank if not BIBA
Time_to_ED	Time to ED presentation	Minutes
Allergic_comorbidity_total	Allergic comorbidites	0=No, 1=Yes, BLANK=not specified
Asthma	Asthma	0=No, 1=Yes, BLANK=not specified
Eczema	Eczema	0=No, 1=Yes, BLANK=not specified
Hayfever	Hay fever	0=No, 1=Yes, BLANK=not specified
Urticaria_Hx	Urticaria	0=No, 1=Yes, BLANK=not specified
Angioedema_Hx	Angioedema	0=No, 1=Yes, BLANK=not specified
Family_History_Anaphylaxis	Family history of anaphylaxis	0=No, 1=Yes, BLANK=not specified
Family_history_Atopy	Family history of atopy	0=No, 1=Yes, BLANK=not specified
Known_allergy_to_exposure	Known allergy to THIS allergen	0=No, 1= Yes
Previous_anaphylaxis	Previous anaphylaxis	0=No, 1=Yes, BLANK=not specified
Previous_anaphylaxis_to_this_allergen	Previous anaphylaxis to THIS offending allergen	0=No, 1=Yes, BLANK=not specified
Previous_ED_anaphylaxis_presentation	Previous ED attendance with anaphlyiaxs	0=No, 1=Yes, BLANK=not specified
Previous_autoinjector	Previous prescription of autoinjector	0=No, 1 =Yes 0.15mg, 2= Yes 0.3mg, 3= Dose not stated
Ventoli	Ventolin	0=No, 1=Yes
HR_highest	HR - Highest recorded
HR_lowest	HR - Lowest recorded
SBP_high	SBP - highest
SBP_low	SBP - lowest
DBP_high	DBP - highest
DBP_low	DBP - lowest
RR_high	RR - highest
RR_low	RR- lowest
PO2_low	PO2 - lowest
Temp	Temp
Tachycardia	HR too high
Hypotension	SBP too low
Tachypnoea	RR too high
Hypoxic	HYPOXAEMIA
Urticaria	Generalized hives/urticaira	0=No, 1=Yes, BLANK=not specified
Pruritus	Pruritus	0=No, 1=Yes, BLANK=not specified
Flushed	Flushing	0=No, 1=Yes, BLANK=not specified
Swelling	Swollen lips-tongue-uvula/Angioedema	0=No, 1=Yes, BLANK=not specified
Cutaneous_total	CUTANEOUS_ANY
Diaphoresis	Diaphoresis	0=No, 1=Yes, BLANK=not specified
Conjunctivitis	Rhinitis/conjunctivits	0=No, 1=Yes, BLANK=not specified
Erythema_local	Erythema - loca	0=No, 1=Yes, BLANK=not specified
Erythema_general	Erythema- generalised	0=No, 1=Yes, BLANK=not specified
Periorbital_edema	Periorbital edema
Dyspnoea	Dyspnoea	0=No, 1=Yes, BLANK=not specified
Wheeze	Wheeze/bronchospasm	0=No, 1=Yes, BLANK=not specified
Stridor	Stridor	0=No, 1=Yes, BLANK=not specified
Reduced_PEF	Reduced PEF	0=No, 1=Yes, BLANK=not specified
Hypoxia_sats	Sats_hypoxic
Hypoxia	Hypoxemia	0=No, 1=Yes, BLANK=not specified
Resp_TOTAL	RESP_ANY
Chest_tight	Chest tightness	0=No, 1=Yes, BLANK=not specified
Cough	Cough	0=No, 1=Yes, BLANK=not specified
Throat_tight	Tightness of throat	0=No, 1=Yes, BLANK=not specified
Difficulty_talking	Difficulty talking/Hoarse	0=No, 1=Yes, BLANK=not specified
Hypotension	Hypotension	0=No, 1=Yes, BLANK=not specified <3/12=60, 3/12-1=65, 1-4=70, 80=5-11, 12-18=95)
SBP_low	SBP_low
ANY_HYPOTENSIO	ANY_HYPOTENSION
Hypotonia	Hypotonia	0=No, 1=Yes, BLANK=not specified
Incontinence	Incontinence	0=No, 1=Yes, BLANK=not specified
Syncope	Syncope	0=No, 1=Yes, BLANK=not specified
CVS_total	CVS_collapse
Dizziness	Dizziness
Cyanosis	Cyanosis	0=No, 1=Yes, BLANK=not specified
Cap_refill	CR>2 seconds	0=No, 1=Yes, BLANK=not specified
Pallor	Pallor	0=No, 1=Yes, BLANK=not specified
Abdo_pain	Crampy abdo pain	0=No, 1=Yes, BLANK=not specified
Vomiting	Vomiting	0=No, 1=Yes, BLANK=not specified
GIT_total	GIT
Diarrhoea	Diarrhoea	0=No, 1=Yes, BLANK=not specified
Nausea	Nausea
Confusion	Confusion	0=No, 1=Yes, BLANK=not specified
Irritable	Irritability	0=No, 1=Yes, BLANK=not specified
Decreased_consciousness	Impaired/loss of consciousness	0=No, 1=Yes, BLANK=not specified
GCS_less13	GCS<13
GCS_total	GCS	List
CUTANEOUS	CUTANEOUS MANIFESTATION	0=No, 1=Yes, BLANK=not specified
RESPIRATORY	RESPIRATORY MANIFESETATION	0=No, 1=Yes, BLANK=not specified
CARDIOVASCULAR	CARDIOVASCULAR MANIFESTATION	0=No, 1=Yes, BLANK=not specified
GASTROINTESTINAL	GASTROINTESTINAL MANIFESTATION	0=No, 1=Yes, BLANK=not specified
SYSTEMS_TOTAL	SYSTEMS total
Known_allergy_total	Known allergen exposure	0=No,1 = Yes
Likely_allergen	Likely allergen	0=No,1 = Yes
CRITERIA_1A	Anphylaxis 1 - cutaneous + resp	0=No, 1=Yes (1= Cutaenous + Resp/Cardio OR 2= Likely allergen + 2 of Cutaneous/Resp/Cardio/GIT OR 3= Known allergen + Hypotension)
CRITERIA_1B	Anaphylaxis 1 - Cutaneous + cardio
CRITERIA2	Anaphylaxis 2 (allergen +2 systems)
CRITERIA3	Anaphylaxis 3 (Known allergen + low BP)
TOTAL_CRITERIA	ANAPHYLAXIS - total
ANAPHYLAXIS_CRITERIA_MET	ANAPHYLAXIS - Yes_or_no	0=No, 1= Yes
ED_ANAPHYLAXIS_DX	ED Diagnosis anaphylaxis	0=No, 1= Yes
GRADE_3_SEVERITY	GRADE 3 severity
SEVERITY	SEVERITY
AMBULANCE_DX	Ambulance diagnosis	Blank = not specified, 1= anaphylaxis , 2= allergic reaction, 3= shortness of breath, 4= altered conscious state, 5= chest pain, 6= rash, 7= swollen lips/facial swelling, 8= seizure, 9 = faint, 10 = febrile
Autoinjector_available	Autoinjector available	0=No, 1=Yes, BLANK=not specified
Autoinjector_used	Autoinjector used	0=No, 1=Yes 0.15mg, 2=Yes 0.3mg, 3=Yes Dose not stated
Prehospital_adrenaline_given	Adrenaline given	0=No, 1=own autoinjector, 2=another's autoinjector, 3=school autoinjector, 5=doctor's office, 6= external hospital
Prehospital_adrenaline_dose	Adrenaline dose given	mg
Prehospital_adrenaline_route	Route	1= IM, 2=SC, 3=IV, 4=Nebulised, BLANK = not stated
Reason_not_autoinjector	If not used why?	1= indicated by not given, 2=symptoms resolved, 3= expired, 4=not seen as severe enough, 5=didn't have on person, 6= unsure , 7= unable to give BLANK = not specified
Time_to_autoinjector	Time to first adrenaline	30
Number_prehospital_adrenaline	Number of adrenaline doses pre	Number
Prehospital_antihistamien	Antihistamine taken	0=No, 1=Yes, BLANK=not specified
Prehospital_antihistamine_type	List	1= not specified, 2= Loratadine, 3= Cetirizine , 4= Promethazine, 5= Fexofenadine, 6= dexchlorpheniramine, 7= desloratadine, 8 =Brompheniramine, 9= prolaramine, 10= Diphenhydramine
Prehospital_antihistamines_route	Route	1=oral, 2=IM, 3=IV
Prehospital_antihistamine_dose	Dose	mg
2nd_prehospital_antihistamine	2nd Antihistamien taken	1= not specified, 2= Loratadine, 3= Cetirizine , 4= Promethazine, 5= Fexofenadine, 6= dexchlorpheniramine, 7= desloratadine, 8 =Brompheniramine, 9= prolaramine, 10= Diphenhydramine
Prehospital_H2	H2 antihistamine taken	0=No, 1=Ranitidine, BLANK=not specified
Prehospital_steroid_type	Steroid taken	0=No, 1= Dex, 2=Pred, 3=Methly pred, 4= Hydrocortisone, 5=Other LIST
Prehospital_steroid_route	Route	1=oral, 2=IM, 3=IV
Prehospital_steroid_dose	Dose	mg
2nd_prehospital_steroid_type	2nd Steroid	0=No, 1= Dex, 2=Pred, 3=Methly pred, 4= Hydrocortisone, 5=Other LIST
2nd_prehospital_steroid_route	Route	1=oral, 2=IM, 3=IV
2nd_prehospital_steroid_dose	Dose	mg
Prehospital_beta_agonist	Inhaled beta agonist	0=No, 1=Yes, BLANK=not specified
Ambulance_adrenaline	Adrenalien given by ambulance	0=No, 1=Yes, BLANK=not specified
Ambulance_adrenaline_dose	Dose	mg
Ambulance_adrenaline_time	Time to ambo adrenaline	Minutes FROM ARRIVAL
Ambulance_steroids	Steroids	0=No, 1= Dex, 2=Pred, 3=Methly pred, 4= Hydrocortisone, 5=Other LIST
Ambulance_steroids_route	Route	1=0ral, 2=IM, 3=IV
Ambulance_steroids_dose	Dose	mg
Ambulance_antihistamine	Antihistamines	List
Ambulance_antihistamine_route	Route	1=Oral, 2=IM, 3=IV
Ambulance_antihistamine_dose	Dose	mg
Ambulance_oxygen	Oxygen	L/min
Ambulance_beta_agonist	Nebulised beta agonist	0=No, 1=Yes, BLANK=not specified
Ambulance_fluids	IV fluds	ml
Ambulance_neb_adrenaline	Nebulised adrenaline	0=No, 1=Yes, BLANK=not specified
Adrenaline_ED_first	Adrenaline given in ED	0=No, 1=Yes, BLANK=not specified
1st_EDAdrenaline_dose	Dose	mg (for each dose)
1st_Edadrenaline_time	Time to adrenaline	Minutes
1st_Edadrenaline_route	Route	1= IM, 2=SC, 3=IV, 4=Nebulised, BLANK = not stated
2nd_Edadrenaline	Second adrenaline	1= IM, 2=SC, 3=IV, 4=Nebulised, BLANK = not stated
2nd_Edadrenalinedose	Dose	mg
3rd_Edadrenaline	Third dose	1= IM, 2=SC, 3=IV, 4=Nebulised, BLANK = not stated
3rd_Edadrenalinetime	Dose	mg
Adrenaline_infusion	Adrenalien infusion	0=No, 1=Yes, BLANK=not specified
PREHOSPITAL_ADRENALINE_TOTAL	Pre hospital adrenaline doses	Number
Presumed_anaphylaxis_prehosp_AND_ED		1=Either anaphylaxis criteria met OR prehospital adrenaline for presumed allergic reaction
ED_ADRENALINE_TOTAL	In ED adrenaline doses	Number
TOTAL_ADRENALINE	Total dose of adrenaline	#
TOTAL_ADRENALIEN_DOSE	Total dose	Mg
If_no_adrenaline_why?	If no adrenaline why?	1= indcated by not given, 2=symptoms resolved, 3=parental refusal, 4= not noted, 5= not seen as severe, 6= neb adrenaline given instead, 7= not anaphylaxis, 8= salbutamol given instead, 9=steroids given instead
Neb_adrenaline	Neb adrenaline	0=No, 1= Yes
Neb_adrenaline_dose	Dose	mg
Neb_adrenaline_time	Time to neb	Minutes
2nd_neb_adreanline	2nd Neb	0=No, 1= Yes
2nd_neb_adrenaline_dose	Dose	mg
2nd_neb_adrenaline_time	Time to 2nd neb	Minutes
ED_steroid	Steroids given	0=No, 1= Dex, 2=Pred, 3=Methly pred, 4= Hydrocortisone, 5=Other LIST
ED_steroid_dose	Dose	mg
ED_steriod_route	Route	1=oral, 2=IM, 3=IV
ED_steroid_time	Time to steroid	Minutes
2nd_ED_steroid	Steroids given	0=No, 1= Dex, 2=Pred, 3=Methly pred, 4= Hydrocortisone, 5=Other LIST
2nd_ED_steroid_dise	Dose	mg
2nd_ED_steroid_route	Route	1=oral, 2=IM, 3=IV
2nd_ED_steroid_time	Time till second	Minutes
ED_antihistamine	H1 antihistamien	1= not specified, 2= Loratadine, 3= Cetirizine , 4= Promethazine, 5= Fexofenadine, 6= dexchlorpheniramine, 7= desloratadine, 8 =Brompheniramine, 9= prolaramine, 10= Diphenhydramine
ED_antihistamine_route	Route	1=oral, 2=IM, 3=IV
ED_antihistamine_dose	Dose	mg
ED_antihistamine_time	Time to H1	Minutes
2nd_ED_antihistamine	H1 anthistamine	1= not specified, 2= Loratadine, 3= Cetirizine , 4= Promethazine, 5= Fexofenadine, 6= dexchlorpheniramine, 7= desloratadine, 8 =Brompheniramine, 9= prolaramine, 10= Diphenhydramine
2nd_ED_antihistamines_route	Route	1=oral, 2=IM, 3=IV
2nd_ED_antishitamine_dose	Dose	mg
2nd_ED_antihistamine_time	Time to 2nd H1	Minutes
ED_H2	H2 antihistamine	1= Ranitidine
ED_H2_route	Route	1=oral, 2=IM, 3=IV
ED_H2_dose	Dose	mg
ED_H2_time	Time to H2	Minutes
ED_oxygen	Oxygen	L/min
Intubatino	Intubated	0=No, 1=Yes, BLANK=not specified
ED_beta_agonist	Inhaled beta agonist	0=No, 1=Yes, BLANK=not specified
Fluid_1st_HOUR	Volume of IV fluid in first hour	ml BLANK = not stated
Fluid_24_Hours	Volume of IV fluids in first 24 hours	ml BLANK = not stated
Inotropes	Inotropic drugs	0=No, 1=Yes, BLANK=not specified
Ondansetron	Ondansetron	0=No, 1=Yes, BLANK=not specified
Paracetamol	Paracetamol	0=No, 1=Yes, BLANK=not specified
Ibuprofen	Ibuprofen	0=No, 1=Yes, BLANK=not specified
Action_plan	Action plan given/Allergy info	0=No, 1=Yes 2=has action plan, BLANK=not specified
Allergen_avoidance	Allergen avoidance advice	0=No, 1=Yes, BLANK=not specified
Follow_up	Follow up	0= No follow up documented, 1= Allergist/Immunologist, 2= GP, 3= General paediatrician, 4= Paediatrician with allergy interest, 5= Outpatient clinic, 6=rapid review ED clinic
Allergist_recommended	Allergist recommended	0=No, 1=Yes, BLANK=not specified
Allergist_known_to	Known to specialist	0=No, 1=Yes, BLANK=not specified
Autoinjector_prescribed	Autoinjector prescription given	0=No, 1=Yes,2=Already has, 3=recommended, BLANK=not specified
Autoinjector_education	Autoinjector education	0=No, 1= Dr, 2=Nurse, 3=Pharmacist, BLANK= Not stated
Discharge_steroid	Steroids given	0=No, 1=Yes-Pred, 2=Yes-Dex, BLANK=not specified
Discharge_steroid_dose	Steroid dose	mg
Discharge_steroid_days	Steroid length	Days
Discharge_H1	H1 Antihistamine given	1= not specified, 2= Loratadine, 3= Cetirizine , 4= Promethazine, 5= Fexofenadine, 6= dexchlorpheniramine, 7= desloratadine, 8 =Brompheniramine, 9= prolaramine, 10= Diphenhydramine
Discharge_h1_dose	Antihistamien dose	mg
Discharge_h1_days	Antihistamine length	Days
2nd_Discharge_H1	2nd H1	1= not specified, 2= Loratadine, 3= Cetirizine , 4= Promethazine, 5= Fexofenadine, 6= dexchlorpheniramine, 7= desloratadine, 8 =Brompheniramine, 9= prolaramine, 10= Diphenhydramine
Discharge_h2	H2 antihistamine given	1= Ranitidine
Discharge_h2_dose	Antihistamien dose	mg
Discharge_h2_days	Antihistamien length	Days
Biphasic	Biphasic reaction	Blank = No, 1= Yes
